# Supplementary material
Source: Springer Nature journal article supplement (https://www.springermedizin.de/resource/supplementary/12882_2014_871_MOESM2_ESM.pdf/9454498)
Supplement: MOESM2 [file 9454498]

Potentially relevant citations  
screen for retrieval (n=1934)

Citations excluded (n=1882)

Studies retrieved for evaluation (n=52)

'AKI syndrome' patients (n=11)  
Review articles (n=8)  
No outcome of interest (n=23)

Studies included in systematic review (n= 10)
